# Supplementary material for: Dipsacus and Scabiosa Species—The Source of Specialized Metabolites with High Biological Relevance: A Review
Source: MDPI journal article supplement (doi:10.3390/molecules28093754), 2023-04-27
Supplement: s1 [file s1]

**Table S1.** The list of accepted species in the genera *Dipsacus* and *Scabiosa* according to Plants of the World Online database [9].

| Accepted species name                             |                                                  |                                        |
|---------------------------------------------------|--------------------------------------------------|----------------------------------------|
| <i>Dipsacus</i> spp.                              | <i>Scabiosa</i> spp.                             |                                        |
| <i>D. asper</i> Wall. ex DC.                      | <i>S. adzharica</i> Schchian                     | <i>S. japonica</i> Miq.                |
| <i>D. atratus</i> Hook.f. & Thomson ex C.B.Clarke | <i>S. africana</i> L.                            | <i>S. jezoensis</i> Nakai              |
| <i>D. atropurpureus</i> C.Y.Cheng & Z.T.Yin       | <i>S. albanensis</i> R.A.Dyer                    | <i>S. lacerifolia</i> Hayata           |
| <i>D. azureus</i> Schrenk ex Fisch. & C.A.Mey.    | <i>S. amoena</i> J.Jacq.                         | <i>S. lachnophylla</i> Kitag.          |
| <i>D. cephalarioides</i> V.A.Matthews & Kupicha   | <i>S. andryalifolia</i> (Pau) Devesa             | <i>S. libyca</i> Alavi                 |
| <i>D. chinensis</i> Batalin                       | <i>S. angustiloba</i> (Sond.) B.L.Burt ex Hutch. | <i>S. lucida</i> Vill.                 |
| <i>D. comosus</i> Hoffmanns. & Link               | <i>S. arenaria</i> Forssk.                       | <i>Scabiosa</i> × <i>lucidula</i> Beck |
| <i>D. ferox</i> Loisel.                           | <i>S. atropurpurea</i> L.                        | <i>S. mollissima</i> Viv.              |
| <i>D. fullonum</i> L.                             | <i>S. austroafricana</i> Heine                   | <i>S. nitens</i> Roem. & Schult.       |
| <i>D. gmelinii</i> M.Bieb.                        | <i>S. balcanica</i> (Velen.) Velen.              | <i>S. ochroleuca</i> L.                |
| <i>D. inermis</i> Wall.                           | <i>Scabiosa</i> × <i>beauverdiana</i> Palez.     | <i>S. owerinii</i> Boiss.              |
| <i>D. japonicus</i> Miq.                          | <i>S. bipinnata</i> K.Koch                       | <i>S. paphlagonica</i> Bornm.          |
| <i>D. laciniatus</i> L.                           | <i>S. buekiana</i> Eckl. & Zeyh.                 | <i>S. parielii</i> Maire               |
| <i>D. leschenaultii</i> Coult. ex DC.             | <i>S. canescens</i> Waldst. & Kit.               | <i>S. parviflora</i> Desf.             |

|                                                 |                                                   |                                                       |
|-------------------------------------------------|---------------------------------------------------|-------------------------------------------------------|
| <i>D. narcisseanus</i> Lawalrée                 | <i>S. cartenniana</i> A.Pons & Quézel             | <i>S. praemontana</i> Privalova                       |
| <i>D. pilosus</i> L.                            | <i>S. cephalarioides</i> Lojac.                   | <i>S. pyrenaica</i> All.                              |
| <i>D. pinnatifidus</i> Steud. ex A.Rich.        | <i>S. cinerea</i> Lapeyr. ex Lam.                 | <i>S. semipapposa</i> Salzm. ex DC.                   |
| <i>Dipsacus</i> × <i>pseudosylvestris</i> Schur | <i>S. colchica</i> Steven                         | <i>S. silenifolia</i> Waldst. & Kit.                  |
| <i>D. sativus</i> (L.) Honck.                   | <i>S. columbaria</i> L.                           | <i>S. sirnakia</i> Yıld.                              |
| <i>D. strigosus</i> Willd. ex Roem. & Schult.   | <i>S. comosa</i> Fisch. ex Roem. & Schult.        | <i>S. sivrihisarica</i> Yıld.                         |
| <i>D. valsecchii</i> Camarda                    | <i>S. correvoniana</i> Sommier & Levier           | <i>S. solymica</i> (Parolly, Eren & Nordt)<br>Göktürk |
| <i>D. walkeri</i> Arn.                          | <i>S. corsica</i> (Litard.) Gamisans              | <i>S. sosnowskyi</i> Sulak.                           |
|                                                 | <i>S. crinita</i> Kotschy & Boiss.                | <i>S. taygetea</i> Boiss. & Heldr.                    |
|                                                 | <i>S. daucoides</i> Desf.                         | <i>S. tenuis</i> Spruner ex Boiss.                    |
|                                                 | <i>S. drakensbergensis</i> B.L.Burt               | <i>S. thysdrusiana</i> Le Houér.                      |
|                                                 | <i>S. eremophila</i> Boiss.                       | <i>S. transvaalensis</i> S.Moore                      |
|                                                 | <i>S. farinosa</i> Coss.                          | <i>S. triandra</i> L.                                 |
|                                                 | <i>S. fumarioides</i> Vis. & Pančić               | <i>S. triniifolia</i> Friv.                           |
|                                                 | <i>S. galianoi</i> Devesa, Ortega Oliv. & J.López | <i>S. turolensis</i> Pau                              |
|                                                 | <i>S. holosericea</i> Bertol.                     | <i>S. tuzluca</i> Yıld.                               |
|                                                 | <i>S. hyrcanica</i> Steven                        |                                                       |

|  |                                                                                                          |                                                                                                                                                 |
|--|----------------------------------------------------------------------------------------------------------|-------------------------------------------------------------------------------------------------------------------------------------------------|
|  | <i>S. imeretica</i> (Sommier & Levier) Sulak.<br><br><i>S. incisa</i> Mill.<br><i>S. ispartaca</i> Yild. | <i>S. tysonii</i> L.Bolus<br><br><i>S. velenovskiana</i> Bobrov<br><br><i>S. vestina</i> Facchini ex W.D.J.Koch<br><br><i>S. webbiana</i> D.Don |
|--|----------------------------------------------------------------------------------------------------------|-------------------------------------------------------------------------------------------------------------------------------------------------|

Family Caprifoliaceae includes six subfamilies (Diervilloideae, Caprifolioideae, Linnaeoideae, Morinoideae, Dipsacoideae, Valerianoideae) and one genus *Zabelia* [11].
